# Supplementary material for: Early Detection and Treatment of Type 2 Diabetes Reduce Cardiovascular Morbidity and Mortality: A Simulation of the Results of the Anglo-Danish-Dutch Study of Intensive Treatment in People With Screen-Detected Diabetes in Primary Care (ADDITION-Europe)
Source: Oxford University Press journal article supplement (doi:10.2337/dc14-2459), 2015-05-15
Supplement: dc142459supplementarydata.pdf [file dc142459supplementarydata.pdf]

**Supplementary Table 1.** Model assumptions for the assignment of treatments and estimated therapeutic and behavioral adherence rates in the ADDITION-Europe trial

| Treatment                                                                                                     | Intensive treatment                                                                                                                                                                                                                   | Routine care*                                                                                                                                                                                                                         |
|---------------------------------------------------------------------------------------------------------------|---------------------------------------------------------------------------------------------------------------------------------------------------------------------------------------------------------------------------------------|---------------------------------------------------------------------------------------------------------------------------------------------------------------------------------------------------------------------------------------|
| Glycemia:<br>lifestyle→metformin→<br>combination oral<br>therapy→ basal insulin→<br>basal-plus-bolus insulin: | Threshold for intensifying treatment was HbA1c $\geq 6.5$ (48 mmol/mol) with a practitioner rate of concordance with the guideline of 100%.                                                                                           | Threshold for intensifying treatment was HbA1c $\geq 6.5$ (48 mmol/mol) with an adherence rate of 90%.                                                                                                                                |
| Hypertension:<br>ACE-I or ARB is started or intensified (by increasing dose):                                 | Threshold for starting and intensifying treatment was SBP $\geq 135$ with an adherence rate of 70%.<br>When there was a stroke, MI, CHF or revascularization procedure, the adherence rate was 90%.                                   | Threshold for initiating or intensifying treatment was SBP $\geq 135$ with an adherence rate of 70%.<br>When there was a stroke, MI, CHF or revascularization procedure, the adherence rate was 90%.                                  |
| Beta-blocker is started:                                                                                      | When there was a stroke, MI, CHF, or revascularization procedure, the adherence rate was 90%.                                                                                                                                         | When there was a stroke, MI, CHF, or revascularization procedure, the adherence rate was 90%.                                                                                                                                         |
| Dyslipidemia:<br>Statin is started or intensified (by increasing dose):                                       | Threshold for starting and intensifying treatment was total cholesterol $\geq 3.5$ with an adherence rate of 80%. When there was a stroke, MI, CHF, or revascularization procedure, the adherence rate was 90%.                       | Threshold for starting and intensifying treatment was total cholesterol $\geq 3.5$ with an adherence rate of 75%. When there was a stroke, MI, CHF, or revascularization procedure, the adherence rate was 90%.                       |
| Aspirin: recommended for all                                                                                  | Adherence rate was 60%.<br>In the remaining 40%, when there was a stroke, MI, CHF, or revascularization procedure the adherence rate was 90%, and when there was angina the adherence rate was 50%.                                   | Adherence rate was 30%.<br>In the remaining 70%, when there was a stroke, MI, CHF, or revascularization procedure the adherence rate was 90%, and when there was angina the adherence rate was 50%.                                   |
| Smoking cessation:<br>Recommended for all smokers                                                             | Among the current smokers, when there was a stroke, MI, CHF, or revascularization procedure the adherence rate was 100% and when there was angina the adherence rate was 50%. Among the remaining smokers, 5% quit smoking each year. | Among the current smokers, when there was a stroke, MI, CHF, or revascularization procedure the adherence rate was 100% and when there was angina the adherence rate was 50%. Among the remaining smokers, 7% quit smoking each year. |

\* 3-Year Delay in Diagnosis: Simulated as routine care except that treatment was initiated only if there was a cardiovascular event or in the fourth year, whichever occurred first.

6-Year Delay in Diagnosis: Simulated as routine care except that treatment was initiated only if there was a cardiovascular event or in the seventh year, whichever occurred first.
